# Supplementary material
Source: PubMed Central journal article supplement (PMC1538564)

**A**

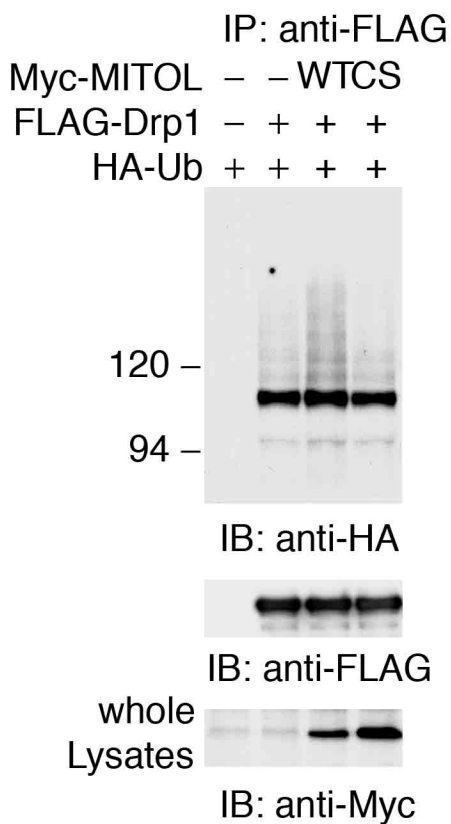

**B**

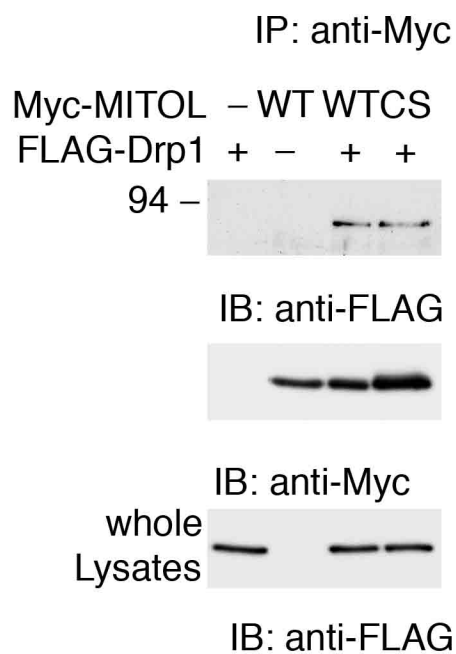

**C**

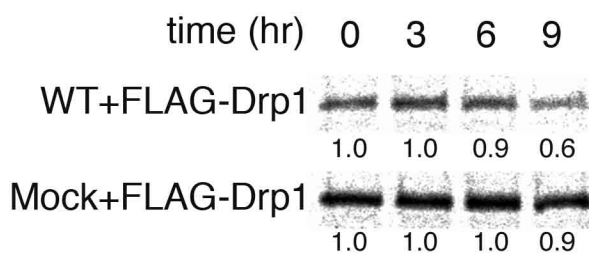

Supplement: 7601249s1.pdf [file 7601249s1.pdf]
